# Supplementary material
Source: publisher figshare collection journal article supplement (https://diabetesjournals.figshare.com/ndownloader/files/22613192)
Supplement: Supplementary file 1 [file 22613192]

## **Supplementary Information**

### **m<sup>6</sup>A mRNA Methylation Controls Functional Maturation in Neonatal Murine $\beta$ Cells**

Yanqiu Wang<sup>1†</sup>, Jiajun Sun<sup>1†</sup>, Zhen Lin<sup>2</sup>, Weizhen Zhang<sup>3</sup>, Shu Wang<sup>1</sup>, Weiqing Wang<sup>1\*</sup>, Qidi Wang<sup>1,4\*</sup>, Guang  
Ning<sup>1\*</sup>

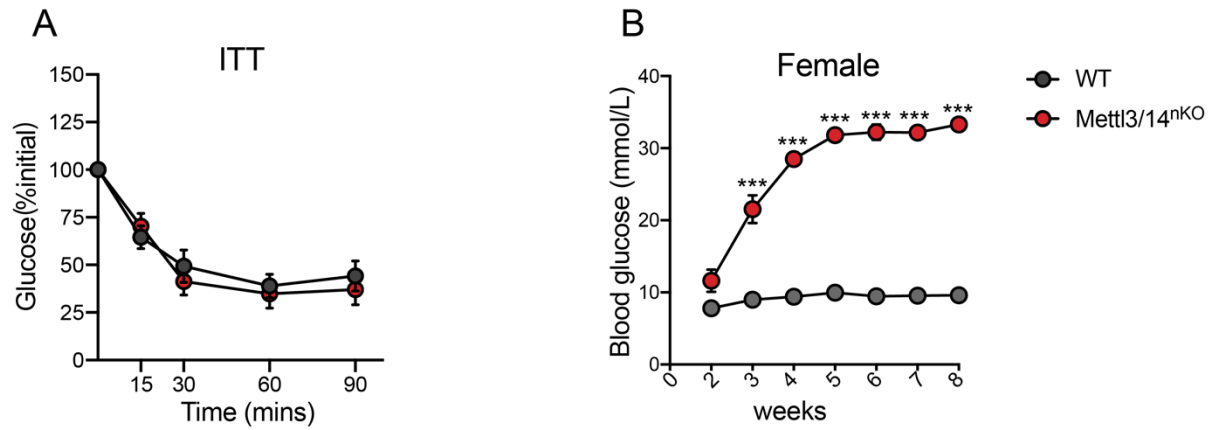

**Supplementary Figure 1. Phenotype of *Mettl3/14<sup>nKO</sup>* mice.**

(A). Blood glucose levels of 4-week-old male WT and *Mettl3/14<sup>nKO</sup>* mice after intraperitoneal injection of insulin (1 IU/kg body weight). (n=5-7)

(B). Random blood glucose of female *Mettl3/14<sup>nKO</sup>* and WT mice were monitored weekly. (n=3)

Data were presented as mean  $\pm$  SEM of independent experiment indicated as above, \*\*\*p<0.001. Student's t test.

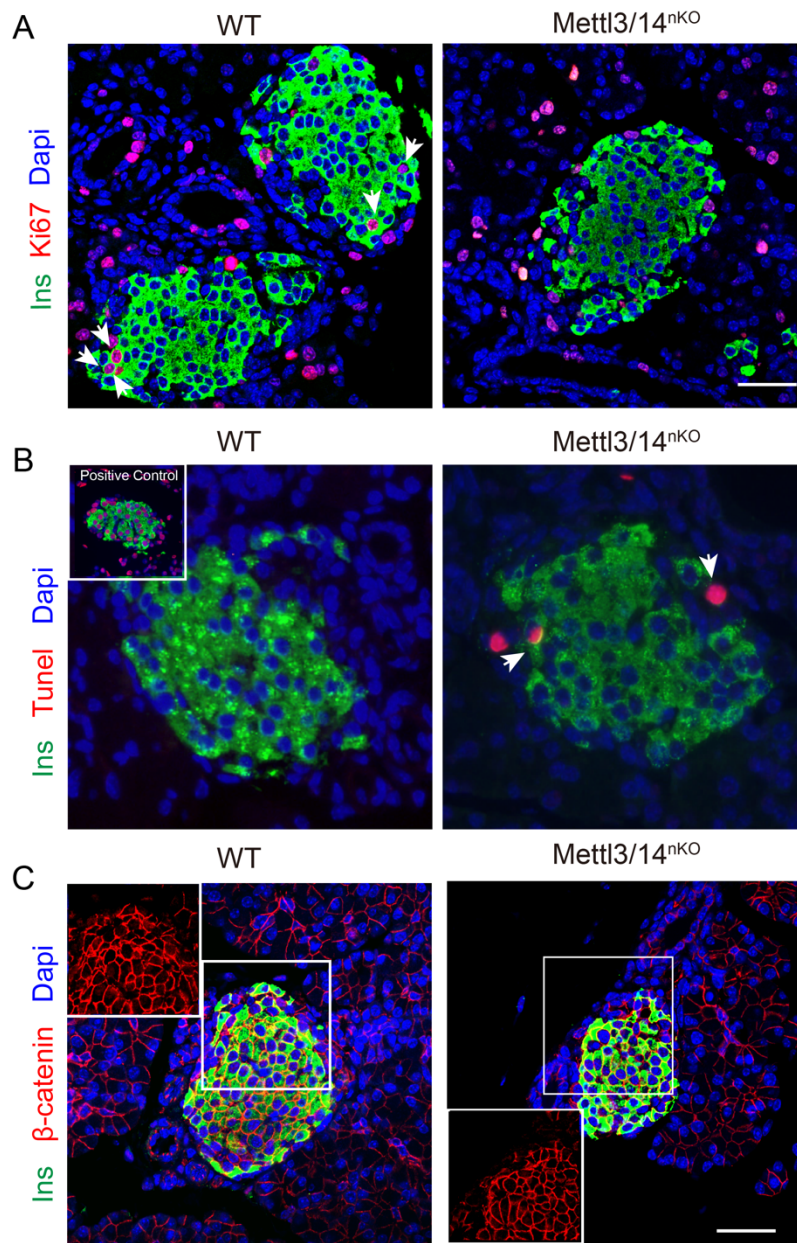

**Supplementary Figure 2. Proliferation, apoptosis, cell size of β cells from P14 *Mettl3/14<sup>nKO</sup>* mice.**

(A). Representative pancreatic sections immunostained for ki67(red) and insulin (green) in *Mettl3/14<sup>nKO</sup>* and WT pancreas at P14.

(B). Representative pancreatic sections immunostained for Tunel (red) and insulin (green) in *Mettl3/14<sup>nKO</sup>* and WT at P14. DNase I treatment was used as positive control.

(C). Representative pancreatic sections immunostained for β-catenin (red) and insulin (green) in *Mettl3/14<sup>nKO</sup>* and WT at P14.

Nuclei were counterstained with Dapi (blue). Scale bars, 20μm.

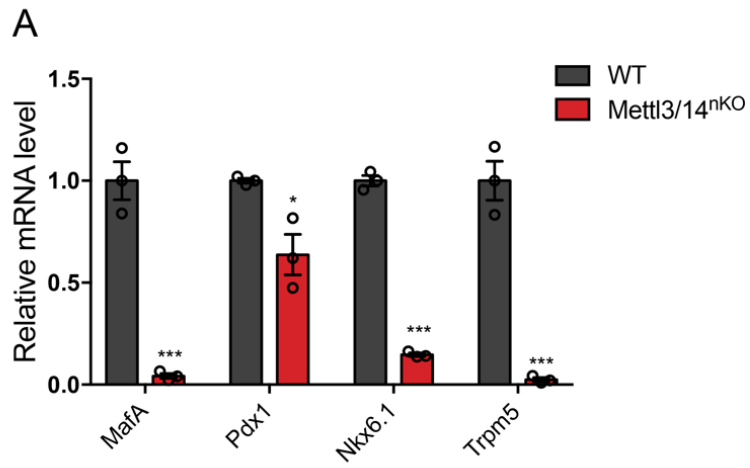

**Supplementary Figure 3. Mettl3/14 regulates critical  $\beta$  cell genes in 8-week *Mettl3/14<sup>nKO</sup>* islets.**

(A). RT-PCR analysis of critical  $\beta$  cell genes in isolated form 8-week *Mettl3/14<sup>nKO</sup>* and WT islets. (n=3)

\* $p < 0.05$ , \*\*\* $p < 0.001$ . Student's t test.

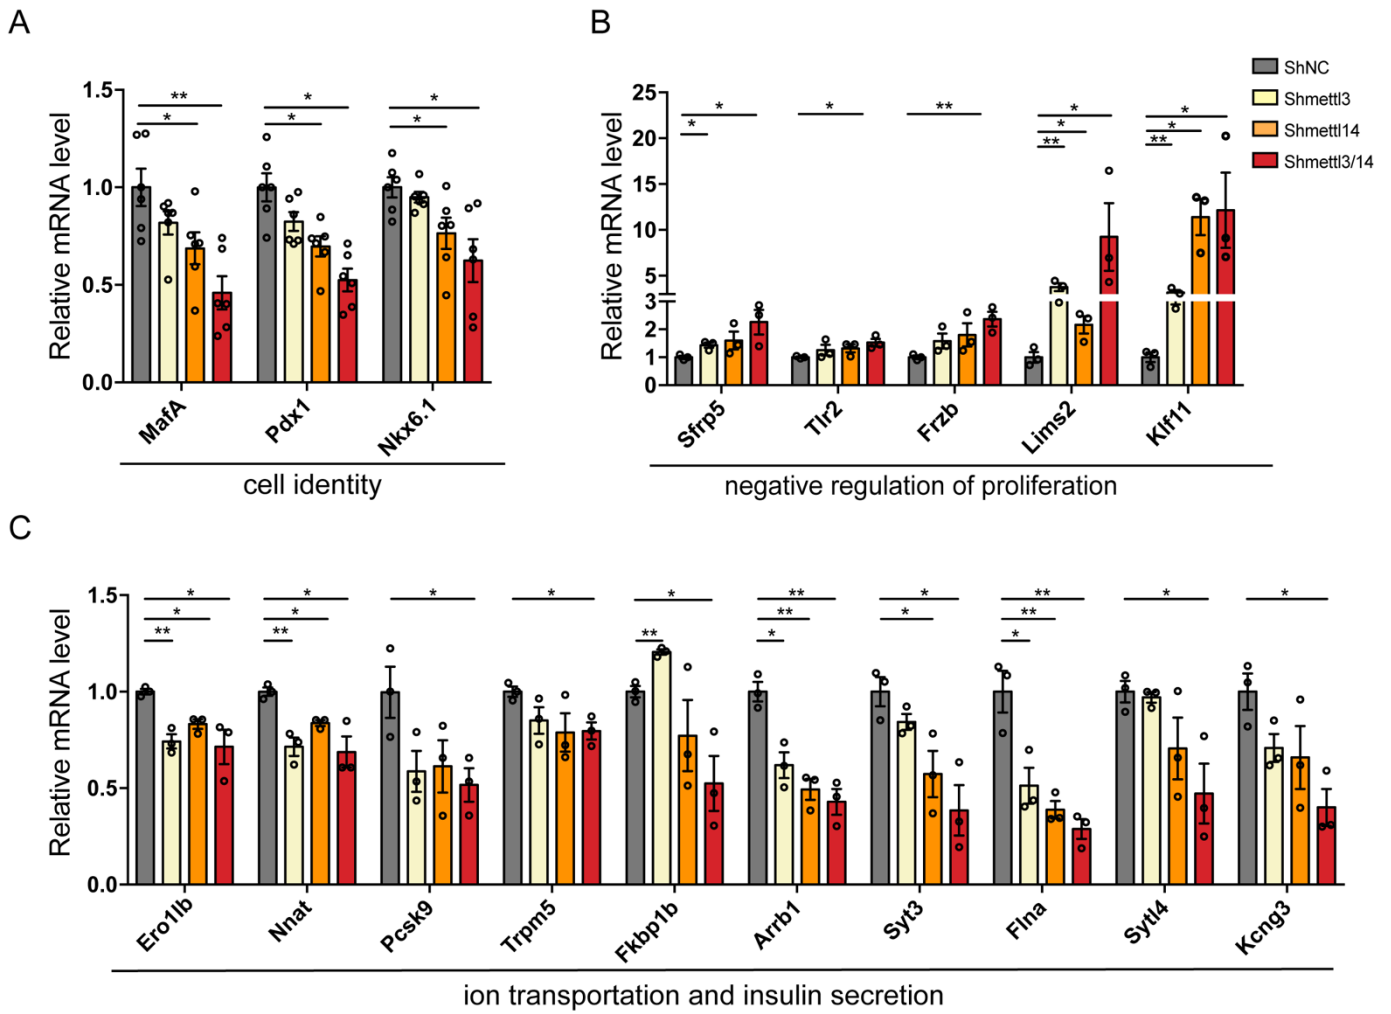

**Supplementary Figure 4. Mettl3/14 regulated critical  $\beta$  cell genes in MIN6 cells.** (A-C) MIN6 cells were treated with ShMettl3, ShMettl14, ShMettl3/14 or control lentiviruses for 48h, then RT-PCR analysis were performed to examine the expression levels of critical  $\beta$  cell transcription factors (A) and genes involved in proliferation inhibition (B), genes involved in ion transportation and insulin secretion (C) (n=3-6).

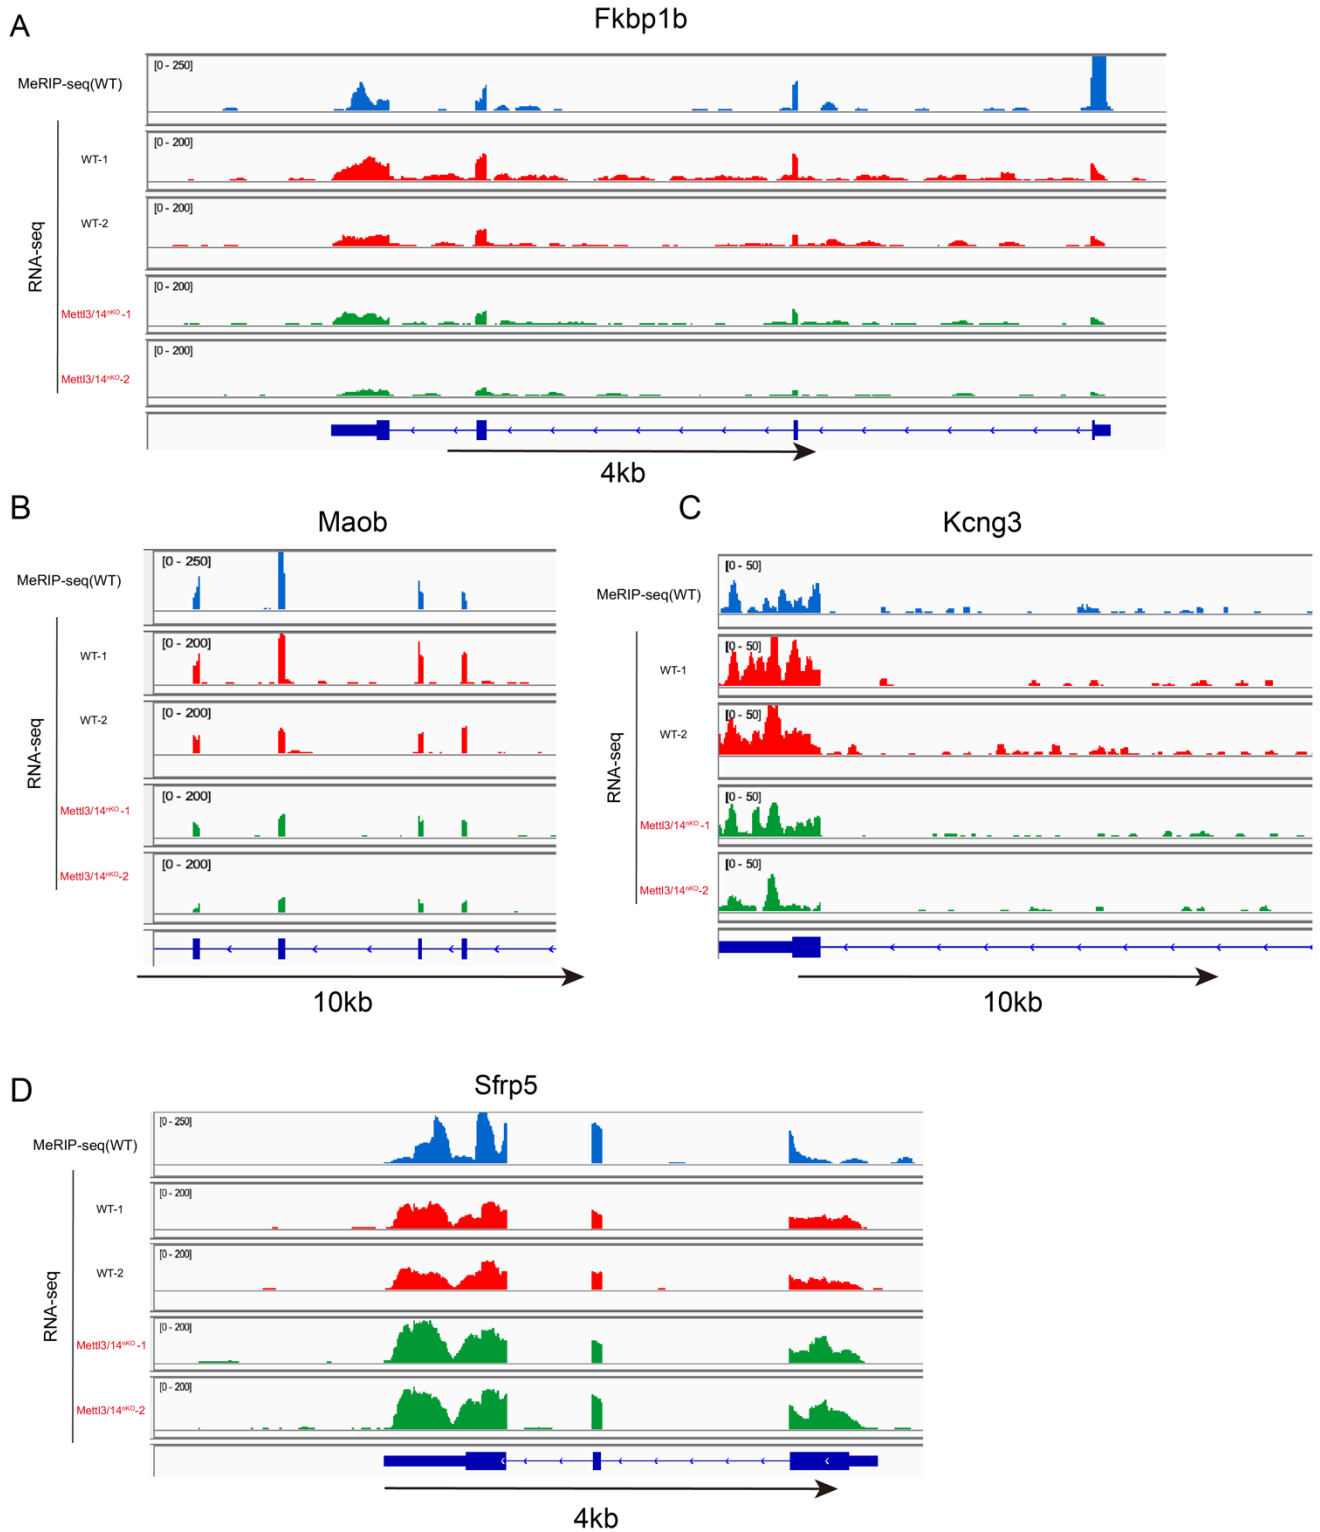

**Supplementary Figure 5. Differentially expressed genes with m<sup>6</sup>A modifications in P14 *Mettl3/14<sup>nKO</sup>* islets.**

(A-D). Integrative Genomics Viewer (IGV) tracks showed RNA-seq reads distribution in *Fkbp1b*(A), *Maob*(B), *Kcng3*(C) and *Sfrp5* (D) mRNA of P14 WT and *Mettl3/14<sup>nKO</sup>* islets (lower panels), and MeRIP-seq reads distribution in mRNA (upper panels).

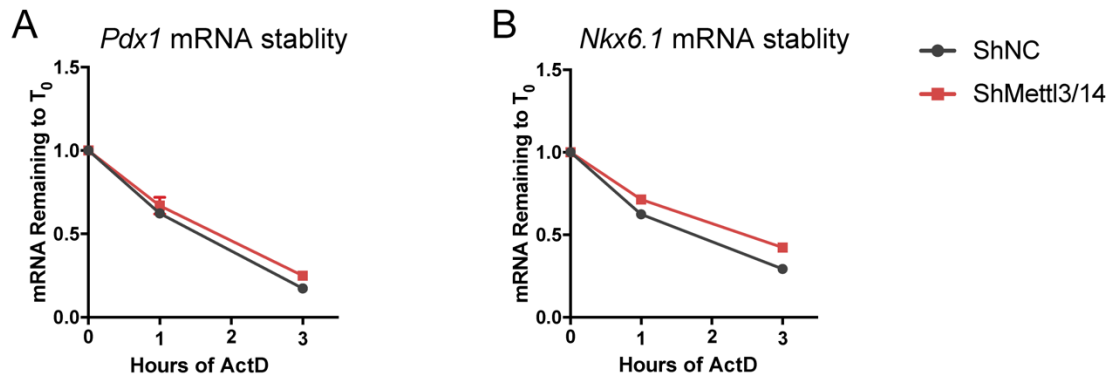

**Supplementary Figure 6. Mettl3/14 does not affect *Pdx1*, *Nkx6.1* mRNA stability in MIN6 cells.** (A, B) The relative amount of *Pdx1*(A) and *Nkx6.1* (B) mRNA in MIN6 cells after 0, 1, 3h ActD treatment with or without shMettl3/14 were determined. (n=3)

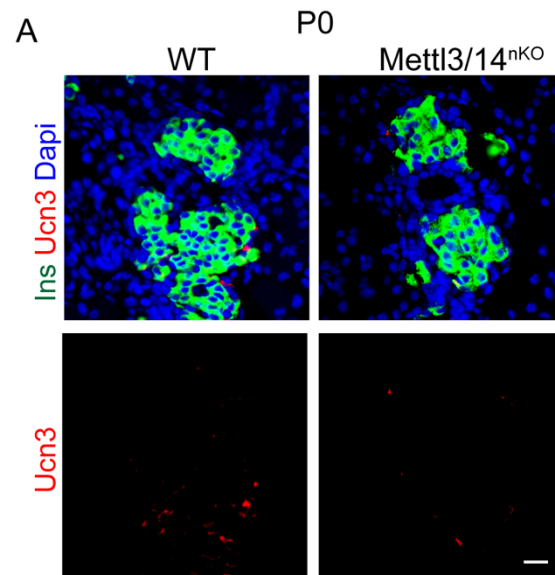

**Supplementary Figure 7. Ucn3 was not detected in P0 *Mettl3/14<sup>nKO</sup>* and WT islets.** (A) Representative pancreatic sections from P0 WT and *Mettl3/14<sup>nKO</sup>* were co-immunostained for insulin (Ins, green) and Ucn3 (red). Nuclei were counterstained with Dapi (blue). Scale bar: 20μm.



Supplementary Table 1. Clinical Characteristics of ND and T2D individuals.

| ND group |                 |                |                |                 |                             |                      |                                    |
|----------|-----------------|----------------|----------------|-----------------|-----------------------------|----------------------|------------------------------------|
| Case ID  | Gender<br>(F/M) | Age<br>(years) | BMI<br>(kg/m²) | FBG<br>(mmol/L) | Course of<br>T2D<br>(years) | Antidiabetic therapy |                                    |
| 639059   | F               | 51             | 24.34          | 5.59            | N/A                         | /                    | pancreatic serous microcystadenoma |
| 621219   | M               | 64             | 23.03          | 4.58            | N/A                         | /                    | pancreatic serous microcystadenoma |
| 644731   | F               | 50             | 18.51          | 4.97            | N/A                         | /                    | pancreatic mucinous cystadenoma    |
| 640422   | M               | 58             | 24.62          | 5.12            | N/A                         | /                    | pancreatic serous microcystadenoma |
| 648986   | F               | 55             | 18.51          | 5.54            | N/A                         | /                    | pancreatic mucinous cystadenoma    |
| Mean     |                 | 55.6           | 21.8           | 5.16            |                             |                      |                                    |
| SEM      |                 | 2.5            | 1.37           | 0.19            |                             |                      |                                    |

| T2D group |                 |                |                |                 |                             |                                 |                                         |
|-----------|-----------------|----------------|----------------|-----------------|-----------------------------|---------------------------------|-----------------------------------------|
| Case ID   | Gender<br>(F/M) | Age<br>(years) | BMI<br>(kg/m²) | FBG<br>(mmol/L) | Course of<br>T2D<br>(years) | Antidiabetic therapy            | pathological diagnosis                  |
| 651833    | F               | 49             | 26.22          | 5.79            | 5                           | Insulin+Acarbose                | pancreatic mucinous cystadenoma         |
| 551593    | F               | 58             | 19.92          | 6.82            | 17                          | Insulin+ Metformin+Pioglitazone | intraductal papillary mucinous neoplasm |
| 605223    | F               | 69             | 18.83          | 5.0             | 10                          | Metformin                       | pancreatic serous microcystadenoma      |
| 598838    | F               | 46             | 24.24          | 5.80            | 9                           | Insulin+Metformin+Voglibose     | pancreatic serous microcystadenoma      |
| 491670    | M               | 71             | 26.04          | 5.46            | 10                          | Glimepiride                     | pancreatic serous oligocystic adenoma.  |
| Mean      |                 | 58.6           | 23.05          | 5.77            | 10.2                        |                                 |                                         |
| SEM       |                 | 5.1            | 1.55           | 0.30            | 1.9                         |                                 |                                         |

All clinical characteristics of human subjects are summarized.

**Supplementary Table 2.** RT-PCR primer sequences of target genes.

| GENE    | SPECIES | FORWARD                 | REVERSE                 |
|---------|---------|-------------------------|-------------------------|
| Mafa    | Mouse   | GCTTCAGCAAGGAGGAGGTCAT  | TCTCGCTCTCCAGAATGTGCCG  |
| Pdx1    | Mouse   | TTCCCGAATGGAACCGAGCCTG  | TTTTCCTCGGGTTCCGCTGTGT  |
| Nkx6.1  | Mouse   | TCTGGACAGCAAATCTTCGCCC  | ACTTGGTCCTGCGGTTCTGGAA  |
| Maob    | Mouse   | TACTTGGGGACCGAGTGAAGCT  | CCAAAGCAGGTGGAATGGCACT  |
| Trpm5   | Mouse   | GGTGTTACACTTCGGCTCATC   | CCACAAGCCATACGCTCAGGAA  |
| Sfrp5   | Mouse   | GAGATGCTGCACTGCCACAAGT  | TGCTCCATCTCACACTGGGCAC  |
| Tlr2    | Mouse   | ACAGCAAGGTCTTCCTGGTTCC  | GCTCCCTTACAGGCTGAGTTCT  |
| Frzb    | Mouse   | CTGCCTCTGTCCTCCACTTACT  | CTTACCAAGCCGATCCTTCCAC  |
| Lims2   | Mouse   | CCTTGTCACGACAAGATGGGCA  | CAGGAATGGCTTCTCACACTTGG |
| Klf11   | Mouse   | GCTCATCTTCGCACTCACACAG  | TCTTCTCTCCCGTGTGAGTCCT  |
| Ero1lb  | Mouse   | CTGGATGACTGTGAGCAGGCTA  | TCACAAAAGTGGTCCTGCGAATC |
| Nnat    | Mouse   | GTGGTGGAGGAAGAGGGTTAAG  | CACATTTTGGGGAGGGCTTTCG  |
| Pcsk9   | Mouse   | ATGGCACCAGACAGAGGAAGAC  | CACGCTGTTGAAGTCGGTGATG  |
| Fkbp1b  | Mouse   | GGCAAACAGGAAGTCATCAAAGG | GGTAGCTCCATAGGCCACATCA  |
| Arrb1   | Mouse   | CTTCTGTGCTGAGAACCTGGAG  | GGAAGTGTCTGGTAGTCTCAGC  |
| Syt3    | Mouse   | TCCCAGCAAAGGACTCCAATGG  | GGCACCGAGAACTGAAACGTCT  |
| Flna    | Mouse   | CAGCAAGCTACAGGTGGAACCT  | TCAGTGGTTGCCTCTCGGAAGA  |
| Syt14   | Mouse   | GTGGCATCTTGGGAGACAGAAG  | ACTTCACCAGGTGGTCAATGTCC |
| Kcng3   | Mouse   | TCTGGATGACCGGAGCAGGTAC  | GGTCTCTTGACAACTCACACTTG |
| Mettl3  | Mouse   | CAGTGCTACAGGATGACGGCTT  | CCGTCCTAATGATGCGCTGCAG  |
| Mettl14 | Mouse   | AGAGTGCGGATAGCATTGGTGC  | CTCCTTCATCCAGACACTTCCG  |
| Gapdh   | Mouse   | CATGTTCCAGTATGACTCCACTC | GGCCTCACCCCATTTGATGT    |
